# Supplementary material for: Iron Parameters in Patients Treated with Roxadustat for Anemia of Chronic Kidney Disease
Source: MDPI journal article supplement (doi:10.3390/jcm12134217), 2023-06-22
Supplement: s1 [file s1]

## Iron Parameters in Patients Treated with Roxadustat for Anemia of Chronic Kidney Disease

Tomas Ganz, Francesco Locatelli, Mustafa Arici, Tadao Akizawa, and Michael Reusch

### Supplementary Material

**Table S1.** Study Characteristics of Phase 3 Trials in Patients With Non–Dialysis-Dependent (NDD) and Dialysis-Dependent (DD) Chronic Kidney Disease Randomized to Receive Roxadustat

**Table S2.** Total Iron-Binding Capacity in Patients With Chronic Kidney Disease Randomized to Receive Roxadustat, Erythropoiesis-Stimulating Agent (ESA), or Placebo ( $\mu\text{g/dL}$ )<sup>a</sup>

**Table S3.** Transferrin Saturation in Patients With Chronic Kidney Disease Randomized to Receive Roxadustat, Erythropoiesis-Stimulating Agent (ESA), or Placebo (%)

# Iron Parameters in Patients Treated with Roxadustat for Anemia of Chronic Kidney Disease

Tomas Ganz, Francesco Locatelli, Mustafa Arici, Tadao Akizawa, and Michael Reusch

**Table S1.** Study Characteristics of Phase 3 Trials in Patients With Non–Dialysis-Dependent (NDD) and Dialysis-Dependent (DD) Chronic Kidney Disease Randomized to Receive Roxadustat

|                                          | Chen[11]                              | Chen[10]                               | CL-0314[7]  | CL-0310[6]  | CL-0307[5]  | CL-0308[9]    | CL-0312[9]       | CL-0302[8]                               | ALPS[12]                                 | OLYMPUS[13] | ANDES[14]                             | DOLOMITES[15] | HIMALAYAS[16]                          | ROCKIES[17, 20]                          | PYRENEES[18]                  | SIERRAS[19]                       |
|------------------------------------------|---------------------------------------|----------------------------------------|-------------|-------------|-------------|---------------|------------------|------------------------------------------|------------------------------------------|-------------|---------------------------------------|---------------|----------------------------------------|------------------------------------------|-------------------------------|-----------------------------------|
| Region                                   | China                                 | China                                  | Japan       | Japan       | Japan       | Japan         | Japan            | Japan                                    | Global                                   | Global      | Global                                | Europe        | Global                                 | Global                                   | Europe                        | United States                     |
| Comparator                               | PBO                                   | EA                                     | –           | DA          | DA          | –             | –                | –                                        | PBO                                      | PBO         | PBO                                   | DA            | EA                                     | EA                                       | DA or EA                      | EA                                |
| Randomized, <i>n</i>                     | 154                                   | 305                                    | 100         | 334         | 303         | 75            | 164 <sup>a</sup> | ESA-N: 13<br>ESA-C: 43                   | 597                                      | 2781        | 922                                   | 616           | 1043                                   | 2106                                     | 838                           | 741                               |
| NDD, <i>n</i>                            | 154                                   | –                                      | 100         | 334         | –           | –             | –                | –                                        | 597                                      | 2781        | 922                                   | 616           | NA                                     | NA                                       | NA                            | NA                                |
| ID-DD, <i>n</i>                          | –                                     | –                                      | –           | –           | –           | 75            | –                | 56                                       | –                                        | –           | –                                     | NA            | 1039                                   | 283                                      | –                             | 71                                |
| Stable DD, <i>n</i>                      | –                                     | 305                                    | –           | –           | 303         | –             | 164              | –                                        | –                                        | –           | –                                     | NA            | –                                      | 1823                                     | 838                           | –                                 |
| Baseline Hb, g/dL <sup>b,c</sup>         | 7.0-10.0                              | 9.0-12.0                               | <10.5       | 10.0-12.0   | 10.0-12.0   | ≤10.0         | 10.0-12.0        | ESA-N: <10.5<br>ESA-C: 10.0-12.0         | ≤10.0                                    | <10.0       | ≤10.0                                 | ≤10.5         | ≤10.0                                  | <10.0 or <12.0                           | 9.5-12.0                      | 9.0-12.0                          |
| Hb target, g/dL <sup>c</sup>             | 100-120                               | 100-120                                | 100-120     | 100-120     | 100-120     | 100-120       | 100-120          | 100-120                                  | 100-120                                  | ≥110        | ≥110                                  | 100-120       | 100-120 <sup>d</sup>                   | 100-120 <sup>d</sup>                     | 100-120                       | 100-120 <sup>d</sup>              |
| Roxadustat starting dose, mg, TIW        | 70 (pts 40-60 kg)<br>100 (pts ≥60 kg) | 100 (pts 45-60 kg)<br>120 (pts ≥60 kg) | 50 or 70    | 70 or 100   | 70 or 100   | 50 or 70      | 70 or 100        | ESA-N: 50 or 70<br>ESA-C: 70 or 100      | 70 (pts 45-70 kg)<br>100 (pts 70-160 kg) | 70          | 70 (pts 45-70 kg)<br>100 (pts ≥70 kg) | 70 or 100     | 70 (pts ≤70 kg)<br>100 (pts 70-160 kg) | 70 (pts 45-70 kg)<br>100 (pts 70-160 kg) | 100, 150, or 200 <sup>e</sup> | 70, 100, 150, or 200 <sup>e</sup> |
| Baseline characteristics                 |                                       |                                        |             |             |             |               |                  |                                          |                                          |             |                                       |               |                                        |                                          |                               |                                   |
| Iron-replete, <i>n</i> (%)               | –                                     | –                                      | 43 (43.4)   | 106 (52.7)  | 44 (29.1)   | –             | –                | ESA-N: 11 (84.6)<br>ESA-C: 19 (44.2)     | 204 (52.2)                               | 809 (58.5)  | 373 (60.6)                            | 182 (56.3)    | 406 (77.8)                             | –                                        | 355 (86.0)                    | 360 (97.3)                        |
| Age, <i>y</i> , mean (SD)                | 54.7 (13.3)                           | 47.6 (11.7)                            | 68.8 (11.3) | 69.3 (11.2) | 64.6 (11.7) | 66.2 (12.1)   | 62.8 (11.8)      | ESA-N: 66.1 (10.9)<br>ESA-C: 63.7 (10.1) | 62.0 <sup>f</sup> (20-89)                | 60.9 (14.7) | 64.9 (12.6)                           | 66.8 (13.6)   | 53.8 (14.7)                            | 53.5 (15.3)                              | 61.0 (13.8)                   | 57.6 (13.6)                       |
| eGFR, mL/min, mean (SD)                  | 16.5 (8.0)                            | –                                      | –           | 17.7 (7.9)  | –           | –             | –                | –                                        | 16.5 (10.2)                              | 19.7 (11.7) | 21.9 (11.5)                           | 20.3 (11.5)   | –                                      | –                                        | –                             | –                                 |
| Dialysis vintage ( <i>y</i> ), mean (SD) | –                                     | 4.5 (3.5)                              | –           | –           | 7.7 (7.5)   | 0.053 (0.051) | 7.5 (6.6)        | ESA-N: 3.0 (3.2)<br>ESA-C: 3.2 (3.2)     | –                                        | –           | –                                     | –             | 0.2 (0.07)                             | –                                        | 4.4 (4.2)                     | 4.0 (3.5)                         |

DA, darbepoetin alfa; EA, epoetin alfa; eGFR, estimated glomerular filtration rate; ESA, erythropoiesis-stimulating agent; ESA-N, ESA-naive; ESA-C, ESA-converted; Hb, hemoglobin; ID-DD, incident-to-dialysis dialysis-dependent; NA, not applicable or not available; PBO, placebo; pts, patients; SD, standard deviation; TIW, 3 times per week.

<sup>a</sup>Patients were registered to 1 or 2 roxadustat groups, not randomized.

<sup>b</sup>Baseline hemoglobin varied by ESA use at time of randomization.

<sup>c</sup>To convert to SI units (g/L), multiply numbers by 10.

<sup>d</sup>Hemoglobin maintenance target in ESA-treated patients followed local guidelines and labeling.

<sup>e</sup>Dependent on initial ESA dose 4 weeks prior to randomization.

<sup>f</sup>Median (range).

# Iron Parameters in Patients Treated with Roxadustat for Anemia of Chronic Kidney Disease

Tomas Ganz, Francesco Locatelli, Mustafa Arici, Tadao Akizawa, and Michael Reusch

**Table S2.** Total Iron-Binding Capacity in Patients With Chronic Kidney Disease Randomized to Receive Roxadustat, Erythropoiesis-Stimulating Agent (ESA), or Placebo ( $\mu\text{g/dL}$ )<sup>a</sup>

| Study                      | Roxadustat              |               |                             | ESA                    |               |                            | Placebo                 |               |                            | LSMD (95% CI)          | P Value |
|----------------------------|-------------------------|---------------|-----------------------------|------------------------|---------------|----------------------------|-------------------------|---------------|----------------------------|------------------------|---------|
|                            | n                       | Mean Baseline | LSM CFB (95% CI)            | n                      | Mean Baseline | LSM CFB (95% CI)           | n                       | Mean Baseline | LSM CFB (95% CI)           |                        |         |
| Chen[11]                   | 85                      | 305.25        | 101.68 (66.82) <sup>b</sup> | –                      | –             | –                          | 43                      | 290.95        | -1.84 (54.30) <sup>b</sup> | 105.53 (82.63, 128.38) | –       |
| Chen[10]                   | BL: 204<br>Wk 24: 160   | 264.80        | 53.07                       | BL: 100<br>Wk 24: 94   | 269.83        | -6.70                      | –                       | –             | –                          | 59.78 (45.25, 74.30)   | –       |
| CL-0314[7]                 | 99                      | 268.72        | 32.96 (40.22) <sup>b</sup>  | –                      | –             | –                          | –                       | –             | –                          | –                      | –       |
| CL-0310[6]                 | 201                     | 265.92        | –                           | 131                    | 259.78        | –                          | –                       | –             | –                          | –                      | –       |
| CL-0307[5]                 | 150                     | 242.46        | 43.58 (45.25) <sup>b</sup>  | 151                    | 243.02        | 8.94 (31.84) <sup>b</sup>  | –                       | –             | –                          | –                      | –       |
| CL-0308[9]                 | 74                      | 236.3         | 75.4 (60.9) <sup>b</sup>    | –                      | –             | –                          | –                       | –             | –                          | –                      | –       |
| CL-0312[9]                 | 163                     | 248.6         | 55.9 (53.6) <sup>b</sup>    | –                      | –             | –                          | –                       | –             | –                          | –                      | –       |
| CL-0302[8]                 | –                       | –             | –                           | –                      | –             | –                          | –                       | –             | –                          | –                      | –       |
| ALPS[12] <sup>c</sup>      | –                       | –             | –                           | –                      | –             | –                          | –                       | –             | –                          | –                      | –       |
| OLYMPUS[13]                | BL: 1384<br>Wk 24: 1200 | 230.44        | 30.79 (28.08, 33.50)        | –                      | –             | –                          | BL: 1377<br>Wk 24: 1050 | 232.46        | -3.82 (-6.65, -0.99)       | 34.61 (31.29, 37.93)   | <0.001  |
| ANDES[14]                  | BL: 608<br>Wk 44: 476   | 257.18        | 35.07 (30.13, 40.01)        | –                      | –             | –                          | BL: 305<br>Wk 44: 185   | 262.30        | -3.58 (-10.33, 3.17)       | 38.65 (31.86, 45.45)   | <0.0001 |
| DOLOMITES[15] <sup>c</sup> | –                       | –             | –                           | –                      | –             | –                          | –                       | –             | –                          | –                      | –       |
| HIMALAYAS[16]              | BL: 522<br>Wk 44: 364   | 241.04        | 37.70 (33.28, 42.12)        | BL: 513<br>Wk 44: 383  | 238.06        | 1.65 (-2.73, 6.02)         | –                       | –             | –                          | 36.05 (30.23, 41.87)   | <0.0001 |
| ROCKIES[17]                | BL: 1051<br>Wk 24: 874  | 208.16        | 34.98 (31.77, 38.18)        | BL: 1055<br>Wk 24: 946 | 208.64        | -2.41 (-5.50, 0.68)        | –                       | –             | –                          | 37.38 (33.82, 40.95)   | <0.001  |
| PYRENEES[18]               | –                       | –             | 55.75 (49.38) <sup>b</sup>  | –                      | –             | 15.31 (35.70) <sup>b</sup> | –                       | –             | –                          | –                      | –       |
| SIERRAS[19]                | BL: 369<br>Wk 52: 235   | 201.88        | 47.21 (43.06, 51.37)        | BL: 370<br>Wk 52: 272  | 202.89        | 10.94 (6.95, 14.92)        | –                       | –             | –                          | 36.28 (31.73, 40.82)   | <0.0001 |

Note: n numbers are the same for baseline and CFB unless otherwise specified.

CFB, change from baseline; LSM, least squares mean; LSMD, least squares mean difference.

<sup>a</sup>To convert to SI unit ( $\mu\text{mol/L}$ ), multiply numbers by 0.179.

<sup>b</sup>Change from baseline rather than least squares mean change from baseline.

<sup>c</sup>Source provides no values for this parameter.

# Iron Parameters in Patients Treated with Roxadustat for Anemia of Chronic Kidney Disease

Tomas Ganz, Francesco Locatelli, Mustafa Arici, Tadao Akizawa, and Michael Reusch

**Table S3.** Transferrin Saturation in Patients With Chronic Kidney Disease Randomized to Receive Roxadustat, Erythropoiesis-Stimulating Agent (ESA), or Placebo (%)

| Study                  | Roxadustat               |                            |                                                                     | ESA                    |               |                          | Placebo                 |               |                         | LSMD (95% CI)     | P Value |
|------------------------|--------------------------|----------------------------|---------------------------------------------------------------------|------------------------|---------------|--------------------------|-------------------------|---------------|-------------------------|-------------------|---------|
|                        | n                        | Mean Baseline              | LSM CFB (95% CI)                                                    | n                      | Mean Baseline | LSM CFB (95% CI)         | n                       | Mean Baseline | LSM CFB (95% CI)        |                   |         |
| Chen[11]               | 85                       | 20.6                       | -5.2 (10.4) <sup>a</sup>                                            | –                      | –             | –                        | 43                      | 23.2          | -1.7 (9.2) <sup>a</sup> | -4.3 (-7.4, -1.1) | –       |
| Chen[10]               | BL: 204<br>Wk 27: 160    | 33.8                       | -4.5                                                                | BL: 100<br>Wk 27: 94   | 30.0          | -8.7                     | –                       | –             | –                       | 4.2 (1.5, 6.9)    | –       |
| CL-0314[7]             | 99                       | 27.9                       | 1.0 (10.5) <sup>a</sup>                                             | –                      | –             | –                        | –                       | –             | –                       | –                 | –       |
| CL-0310[6]             | 201                      | 34.1                       | –                                                                   | 131                    | 32.7          | –                        | –                       | –             | –                       | –                 | –       |
| CL-0307[5]             | 150                      | 28.3                       | -1.1 (13.8) <sup>a</sup>                                            | 151                    | 29.0          | -2.4 (13.8) <sup>a</sup> | –                       | –             | –                       | –                 | –       |
| CL-0308[9]             | 74                       | 28.5                       | -5.0 (14.8) <sup>a</sup>                                            | –                      | –             | –                        | –                       | –             | –                       | –                 | –       |
| CL-0312[9]             | 163                      | 29.1                       | -3.9 (15.4) <sup>a</sup>                                            | –                      | –             | –                        | –                       | –             | –                       | –                 | –       |
| CL-0302[8]             | ESA-N: 13<br>ESA-C: 43   | ESA-N: 45.8<br>ESA-C: 35.9 | ESA-N: -14.6 (15.8) <sup>a</sup><br>ESA-C: -8.1 (14.1) <sup>a</sup> | –                      | –             | –                        | –                       | –             | –                       | –                 | –       |
| ALPS[12]. <sup>b</sup> | –                        | –                          | –                                                                   | –                      | –             | –                        | –                       | –             | –                       | –                 | –       |
| OLYMPUS[13]            | BL: 1384<br>Wk 224: 1199 | 29.9                       | -0.8 (-1.4, -0.2)                                                   | –                      | –             | –                        | BL: 1377<br>Wk 24: 1047 | 29.5          | -0.3 (-0.9, 0.4)        | -0.6 (-1.3, 0.2)  | 0.13    |
| ANDES[14]              | BL: 606<br>Wk 44: 476    | 26.3                       | 0.4 (-0.8, 1.7)                                                     | –                      | –             | –                        | BL: 304<br>Wk 44: 185   | 26.2          | 0.5 (-1.2, 2.3)         | -0.1 (-2.0, 1.7)  | 0.90    |
| DOLOMITES <sup>c</sup> | 323                      | 24.0                       | 1.3 (11.8) <sup>a</sup>                                             | 293                    | 23.3          | 5.2 (13.2) <sup>a</sup>  | –                       | –             | –                       | –                 | –       |
| HIMALAYAS[16]          | BL: 522<br>Wk 44: 364    | 27.0                       | -2.7 (-3.9, -1.5)                                                   | BL: 513<br>Wk 44: 383  | 27.6          | -2.2 (-3.4, -1.1)        | –                       | –             | –                       | -0.5 (-2.0, 1.1)  | 0.54    |
| ROCKIES[17]            | BL: 1051<br>Wk 24: 866   | 36.0                       | -1.9 (-2.8, -1.1)                                                   | BL: 1055<br>Wk 24: 939 | 35.0          | -2.4 (-3.3, -1.6)        | –                       | –             | –                       | 0.5 (-0.4, 1.5)   | 0.29    |
| PYRENEES <sup>c</sup>  | 413                      | 33.4                       | -7.3 (17.2) <sup>a</sup>                                            | 257                    | 33.2          | -5.7 (15.0) <sup>a</sup> | –                       | –             | –                       | –                 | –       |
| SIERRAS[19]            | BL: 369<br>Wk 52: 236    | 33.6                       | -6.6 (-8.4, -4.8)                                                   | BL: 370<br>Wk 52: 272  | 33.7          | -8.8 (-10.5, -7.0)       | –                       | –             | –                       | 2.2 (0.2, 4.2)    | 0.034   |

Note: n numbers are the same for baseline and CFB unless otherwise specified.

CFB, change from baseline; ESA, erythropoiesis-stimulating agent; ESA-N, ESA-naive; ESA-C, ESA-converted; LSM, least squares mean; LSMD, least squares mean difference.

<sup>a</sup>Change from baseline (standard deviation) rather than least squares mean change from baseline.

<sup>b</sup>Source provides no values for this parameter.

<sup>c</sup>Astellas data on file.

## Iron Parameters in Patients Treated with Roxadustat for Anemia of Chronic Kidney Disease

Tomas Ganz, Francesco Locatelli, Mustafa Arici, Tadao Akizawa, and Michael Reusch

### References

5. Akizawa T, Iwasaki M, Yamaguchi Y, Majikawa Y, Reusch M. Phase 3, Randomized, Double-Blind, Active-Comparator (Darbepoetin Alfa) Study of Oral Roxadustat in CKD Patients with Anemia on Hemodialysis in Japan. *J Am Soc Nephrol*. 2020;31(7):1628-39.
6. Akizawa T, Iwasaki M, Otsuka T, Yamaguchi Y, Reusch M. Phase 3 Study of Roxadustat to Treat Anemia in Non-Dialysis-Dependant CKD. *Kidney Int Rep*. 2021;6(7):1810-28.
7. Akizawa T, Yamaguchi Y, Otsuka T, Reusch M. A Phase 3, Multicenter, Randomized, Two-Arm, Open-Label Study of Intermittent Oral Dosing of Roxadustat for the Treatment of Anemia in Japanese Erythropoiesis-Stimulating Agent-Naive Chronic Kidney Disease Patients Not on Dialysis. *Nephron*. 2020;144(8):372-82.
8. Akizawa T, Otsuka T, Reusch M, Ueno M. Intermittent Oral Dosing of Roxadustat in Peritoneal Dialysis Chronic Kidney Disease Patients with Anemia: A Randomized, Phase 3, Multicenter, Open-Label Study. *Ther Apher Dial*. 2020;24(2):115-25.
9. Akizawa T, Ueno M, Shiga T, Reusch M. Oral roxadustat three times weekly in ESA-naïve and ESA-converted patients with anemia of chronic kidney disease on hemodialysis: Results from two phase 3 studies. *Ther Apher Dial*. 2020;24(6):628-41.
10. Chen N, Hao C, Liu BC, Lin H, Wang C, Xing C, et al. Roxadustat Treatment for Anemia in Patients Undergoing Long-Term Dialysis. *N Engl J Med*. 2019;381(11):1011-22.
11. Chen N, Hao C, Peng X, Lin H, Yin A, Hao L, et al. Roxadustat for Anemia in Patients with Kidney Disease Not Receiving Dialysis. *N Engl J Med*. 2019;381(11):1001-10.
12. Shutov E, Sulowicz W, Esposito C, Tataradze A, Andric B, Reusch M, et al. Roxadustat for the treatment of anemia in chronic kidney disease patients not on dialysis: a Phase 3, randomized, double-blind, placebo-controlled study (ALPS). *Nephrol Dial Transplant*. 2021;36(9):1629-39.

# Iron Parameters in Patients Treated with Roxadustat for Anemia of Chronic Kidney Disease

Tomas Ganz, Francesco Locatelli, Mustafa Arici, Tadao Akizawa, and Michael Reusch

13. Fishbane S, El-Shahawy MA, Pecoits-Filho R, Van BP, Houser MT, Frison L, et al. Roxadustat for Treating Anemia in Patients with CKD Not on Dialysis: Results from a Randomized Phase 3 Study. *J Am Soc Nephrol*. 2021;32(3):737-55.
14. Coyne DW, Roger SD, Shin SK, Kim SG, Cadena AA, Moustafa MA, et al. Roxadustat for CKD-related Anemia in Non-dialysis Patients. *Kidney Int Rep*. 2021;6(3):624-35.
15. Barratt J, Andric B, Tataradze A, Schomig M, Reusch M, Valluri U, et al. Roxadustat for the treatment of anaemia in chronic kidney disease patients not on dialysis: a Phase 3, randomized, open-label, active-controlled study (DOLOMITES). *Nephrol Dial Transplant*. 2021;36(9):1616-28.
16. Provenzano R, Shutov E, Eremeeva L, Korneyeva S, Poole L, Saha G, et al. Roxadustat for anemia in patients with end-stage renal disease incident to dialysis. *Nephrol Dial Transplant*. 2021;36(9):1717-30.
17. Fishbane S, Pollock CA, El-Shahawy M, Escudero ET, Rastogi A, Van BP, et al. Roxadustat Versus Epoetin Alfa for Treating Anemia in Patients with Chronic Kidney Disease on Dialysis: Results from the Randomized Phase 3 ROCKIES Study. *J Am Soc Nephrol*. 2022;33(4):850-66.
18. Csiky B, Schomig M, Esposito C, Barratt J, Reusch M, Valluri U, et al. Roxadustat for the Maintenance Treatment of Anemia in Patients with End-Stage Kidney Disease on Stable Dialysis: A European Phase 3, Randomized, Open-Label, Active-Controlled Study (PYRENEES). *Adv Ther*. 2021;38(10):5361-80.
19. Charytan C, Manllo-Karim R, Martin ER, Steer D, Bernardo M, Dua SL, et al. A Randomized Trial of Roxadustat in Anemia of Kidney Failure: SIERRAS Study. *Kidney Int Rep*. 2021;6(7):1829-39.
20. Barratt J, Sulowicz W, Schomig M, Esposito C, Reusch M, Young J, et al. Efficacy and Cardiovascular Safety of Roxadustat in Dialysis-Dependent Chronic Kidney Disease: Pooled Analysis of Four Phase 3 Studies. *Adv Ther*. 2021;38(10):5345-60.
